# Supplementary material for: Evaluation of radiation schemes in the CMA-MESO model using high time-resolution radiation measurements in China: I. Long-wave radiation
Source: Copernicus journal article supplement (doi:10.5194/gmd-2024-74), 2024-06-24
Supplement: Supplementary file [file gmd-2024-74-AC3-supplement.pdf]

# Response to Executive Editor Comments

Dear executive editor,

Thank you very much for your reply.

We are sorry for being two weeks late to response your regarding issues. During these days, we have contacted the administrator of the CEMC several times as well as updated the data set (version 2) and evaluation programs to the repository, which are expected to further improve the manuscript.

1. After all attempts, we received a response from the CEMC as: *“Due to the CMA-MESO is an operational weather forecasting model of the CMA, its license is currently only authorized to the CEMC administrator, anyone who wants to use it can contact the license administrator (songzx@cma.gov.cn; Phone number: +86-10-68400477). In addition, an official website of the CEMC (<https://cemc.cma.cn/>) is under construction, introduction of the CEMC models in Chinese is now available on it, and the code of the CMA-MESO is expected to be provided in this website before long.”* Currently, we can only get the statement and website address rather than the proof, which is beyond the ability of the administrator.
2. The initial intention of this manuscript is to evaluate the downward longwave irradiance products using the long-term and high precision observation data over various conditions rather than to evaluate the radiation scheme. We regret to write an inappropriate title in the original manuscript, which is inconsistent with the content of the manuscript and leads to misunderstanding. Thus, in the revision of the manuscript, we modify it to **“Evaluation of surface downward long-wave irradiance forecasts from the CMA-MESO V4.1-V5.1 based on high time-resolution radiation measurements in China”**. In this study, we merely used the operational outputs of the CMA-MESO model and related in-situ DnLWI measurements to carry out the evaluation while did not run the CMA-MESO model or modify its code. Thereby, the code of CMA-MESO was not involved in the manuscript.
3. In this study, we used the IDL V8.2 interpreter to compile our programs on evaluating the prediction of the DnLWI from the CMA-MESO. In addition, the .sav files are just simple binary files, which can also be saved in other data format and updated.

Best regards,

Weijun Quan, Martin Wild, and co-authors

2024-08-01
