# Supplementary material for: Evaluation of radiation schemes in the CMA-MESO model using high time-resolution radiation measurements in China: I. Long-wave radiation
Source: Copernicus journal article supplement (doi:10.5194/gmd-2024-74), 2024-06-24
Supplement: Supplementary file [file gmd-2024-74-AC4-supplement.pdf]

# Response to Executive Editor Comments

Dear executive editor,

Thank you for your reply.

1. We have deposited all data used in this study in zenodo repository (<https://zenodo.org/records/13208489>), which include the original data, data read template (both in .sav and .txt format), as well as a readme.pdf file to explain all variables in the dataset. The DnLWI data in the outputs from the CMA-MESO model are restored in column "DnLWI\_MESO" of the "MESO\_RADI\_CHN\_Hour\_DnLWI.csv". Moreover, the software for evaluating the DnLWI predicted by the CMA-MESO model in this study is available at <https://doi.org/10.5281/zenodo.12920314>, which is the free software with the GPLv3 license. All these data and software are believed to support all the work in this study.
2. We regret to say that we do not have the CMA-MESO code. As mentioned previously, the CMA-MESO model is an operational weather forecast model of CMA and many people are involved in the research and operation of the CMA-MESO. The staffs in CEMC are assigned to different sections (or groups), e.g., model evaluation group, model technology group, data assimilation group, satellite data assimilation group, model coupling group, operational service group, etc. (<https://cemc.cma.cn/>). Authors of the CEMC in this study belong to the evaluation group of the CEMC, which is responsible for evaluating the products of the CMA-MESO and other CMA models based on in-situ observations or other data, and providing necessary information for the model development group to modify the code. In order to standardize management of the CMA-MESO model, the license is currently only authorized to the CEMC administrator on behalf of the CEMC, anyone who wants to use it can contact the license administrator. According to the law of the CEMC, it is not allowed to distribute the CMA-MESO by others or offer any forms of evidence or proof. The similar situations about license were also declared by other authors in the previous publications in the Geosci. Model Dev.

At last, we would appreciate all reviewers and editors for their valuable comments and suggestions.

Best regards,

Weijun Quan, Martin Wild, and co-authors

2024-08-05
